# Supplementary material for: Scent marking in Sunda clouded leopards (Neofelis diardi): novel observations close a key gap in understanding felid communication behaviours
Source: PubMed Central journal article supplement (PMC5064369; doi:10.1038/srep35433), 2016-10-14
Supplement: srep35433-s1.pdf [file srep35433-s1.pdf]

1 Supplementary Video Captions

2

3 Scent marking in Sunda clouded leopards (*Neofelis diardi*): novel observations close a key gap in  
4 understanding felid communication behaviours

5

6 Maximilian L. Allen, Heiko U. Wittmer, Endro Setiawan, Sarah Jaffe, and Andrew J. Marshall

7

8

9 Video 1. Scraping behaviour

10

11 Video 2. Urine spraying behaviour

12

13 Video 3. Cheek rubbing behaviour

14

15 Video 4. Tail wrapping behaviour

16

17 Video 5. Olfaction and flehmen response behaviours

18

19 Video 6. Vocalizations
